# Supplementary material
Source: publisher figshare collection journal article supplement (https://gsajournals.figshare.com/ndownloader/files/13430783)
Supplement: Supplementary file 1 [file 13430783]

## Sheet: Sheet1
Supplementary Table 2. Analysis of genes in the 5.16Mb deleted region and their homoeologs
Gene ID	Gene position	Homoeologous gene	Position of homoeologous gene	Annotation
ZM00001d003939	Chr2: 70,548,849-70,558,717	Zm00001d025887	Chr10:133,094,068-133,097,996	Probable metal-nicotianamine transporter YSL6
ZM00001d003941	Chr2: 70,598,355-70,604,588	Zm00001d025888	Chr10:133,098,210-133,101,984	Probable metal-nicotianamine transporter YSL6
ZM00001d003943	Chr2: 70,750,114-70,750,503	NO		unknown
ZM00001d003945	Chr2: 71,037,398-71,040,700	Zm00001d025241	Chr10:110,753,799-110,756,285	mouse DNA EBV homolog1
ZM00001d003947	Chr2: 71,150,965-71,157,527	Zm00001d025240	Chr10:110,657,182-110,663,551	2-oxoglutarate dehydrogenase E1 component
ZM00001d003948	Chr2: 71,573,370-71,575,580	Zm00001d025238	Chr10:110,572,318-110,574,522	DNAJ heat shock N-terminal domain-containing protein
ZM00001d003949	Chr2: 71,579,120-71,583,381	Zm00001d025237	Chr10:110,564,312-110,569,524	Major facilitator superfamily protein
ZM00001d003950	Chr2: 71,776,772-71,780,884	Zm00001d025237	Chr10:110,564,312-110,569,524	Major facilitator superfamily protein
ZM00001d003953	Chr2: 72,083,967-72,084,636	Zm00001d044135	Chr3:220,066,585-220,067,204	Alanine aminotransferase 2 mitochondrial
ZM00001d003954	Chr2: 72,101,436-72,103,487	Zm00001d025237	Chr10:110,564,312-110,569,524	Major facilitator superfamily protein
ZM00001d003957	Chr2: 72,199,248-72,202,030	Zm00001d025236	Chr10:110,442,775-110,445,367	Mediator of RNA polymerase II transcription subunit 30
ZM00001d003958	Chr2: 72,202,914-72,211,422	Zm00001d025235	Chr10:110,432,656-110,441,915	Calmodulin-binding transcription activator 4
ZM00001d003961	Chr2: 72,418,869-72,419,191	Zm00001d016568	Chr5:167,817,324-167,817,819	unknown
ZM00001d003962	Chr2: 72,420,037-72,420,246	Zm00001d016567	Chr5:167,775,161-167,775,370	unknown
ZM00001d003964	Chr2: 72,580,663-72,582,175	NO		bHLH-transcription factor 4
ZM00001d003965	Chr2: 72,593,123-72,593,455	Zm00001d008591	Chr8:13,719,470-13,722,383	Octicosapeptide/Phox/Bem1p family protein
ZM00001d003966	Chr2: 72,600,749-72,601,084	NO		unknown
ZM00001d003967	Chr2: 72,663,143-72,665,832	Zm00001d021978	Chr7:167,479,085-167,480,899	ARM repeat superfamily protein
ZM00001d003968	Chr2: 72,940,298-72,940,970	Zm00001d028395	Chr1:33,168,640-33,169,312	Fructose-bisphosphate aldolase 3 chloroplastic
ZM00001d003969	Chr2: 72,941,395-72,942,662	Zm00001d028394	Chr1:33,167,117-33,168,214	Bifunctional D-cysteine desulfhydrase/1-aminocyclopropane-1-carboxylate deaminase mitochondrial
ZM00001d003970	Chr2: 72,943,450-72,946,006	Zm00001d028393	Chr1:33,164,527-33,166,953	UDP-N-acetylglucosamine diphosphorylase 2
ZM00001d003972	Chr2: 72,963,458-72,964,670	Zm00001d049314	Chr4:25,984,854-25,986,872	unknown
ZM00001d003974	Chr2: 72,986,095-72,986,979	Zm00001d025893	Chr10:133,218,764-133,222,199	Phosphoenolpyruvate carboxylase family protein
ZM00001d003975	Chr2: 73,016,785-73,020,682	Zm00001d025228	Chr10:110,194,156-110,198,209	unknown
ZM00001d003978	Chr2: 73,194,251-73,194,862	Zm00001d016564	Chr5:167,727,847-167,728,356	unknown
ZM00001d003980	Chr2: 73,459,583-73,461,853	Zm00001d002699	Chr2:19,509,745-19,511,940	Subtilisin-like protease SBT1.9
ZM00001d003981	Chr2: 73,518,754-73,519,134	Zm00001d025225	Chr10:110,101,288-110,101,653	Drought-induced protein 1
ZM00001d003982	Chr2: 73,519,830-73,521,307	Zm00001d048961	Chr4:10,889,007-10,890,321	unknown
ZM00001d003983	Chr2: 73,525,142-73,527,644	Zm00001d050495	Chr4:93,358,403-93,360,172	Aldehyde dehydrogenase family 7 member B4
ZM00001d003984	Chr2: 73,709,485-73,711,737	Zm00001d025222	Chr10:109,967,184-109,969,328	splicing factor-related
ZM00001d003986	Chr2: 73,811,638-73,814,597	Zm00001d044656	Chr3:234,154,462-234,158,359	Leucine-rich repeat protein kinase family protein
ZM00001d003988	Chr2: 73,867,360-73,868,209	NO		unknown
ZM00001d003990	Chr2: 74,065,459-74,068,139	Zm00001d033566	Chr1:267,283,309-267,286,505	Purple acid phosphatase 3
ZM00001d003992	Chr2: 74,074,098-74,078,682	Zm00001d030030	Chr1:100,657,980-100,662,543	unknown
ZM00001d003993	Chr2: 74,154,075-74,155,773	Zm00001d025218	Chr10:109,657,976-109,659,501	F-box protein
ZM00001d003994	Chr2: 74,388,931-74,393,436	Zm00001d013310	Chr5:8,294,262-8,298,162	Deoxyhypusine synthase
ZM00001d003995	Chr2: 74,394,439-74,398,961	Zm00001d020491	Chr7:118,699,108-118,719,439	unknown
ZM00001d003996	Chr2: 74,407,929-74,412,907	Zm00001d025208	Chr10:109,171,895-109,178,235	myosin heavy chain-related
ZM00001d003999	Chr2: 74,637,520-74,638,152	Zm00001d050553	Chr4:99,761,885-99,762,466	OSJNBa0072D21.11 protein
ZM00001d004000	Chr2: 74,645,261-74,645,692	NO		unknown
ZM00001d004001	Chr2: 74,646,851-74,647,672	Zm00001d025603	Chr10:123,628,630-123,629,001	DExH-box ATP-dependent RNA helicase DExH16 mitochondrial
ZM00001d004002	Chr2: 74,666,014-74,667,214	Zm00001d002862	Chr2:24,929,317-24,931,138	casein kinase 1-like protein 2
ZM00001d004004	Chr2: 74,914,141-74,915,772	NO		unknown
ZM00001d004006	Chr2: 75,025,145-75,030,389	Zm00001d012019	Chr8:166,620,718-166,622,319	SNF1-related protein kinase regulatory subunit gamma-1
ZM00001d004007	Chr2: 75,054,959-75,056,736	Zm00001d025205	Chr10:109,117,980-109,119,599	Transcription factor FER-LIKE IRON DEFICIENCY-INDUCED TRANSCRIPTION FACTOR
ZM00001d004008	Chr2: 75,122,349-75,135,616	Zm00001d044186	Chr3:221,397,672-221,415,050	unknown
ZM00001d004009	Chr2: 75,235,597-75,238,270	Zm00001d009509	Chr8:68,252,546-68,254,650	60S ribosomal protein L37a-2
ZM00001d004010	Chr2: 75,418,521-75,419,477	Zm00001d016253	Chr5:153,523,441-153,524,604	phosphatidylethanolamine-binding protein21
